# Supplementary material for: Isolation and characterization of the first circular single-stranded polymetallic lanthanide-containing helicate
Source: Royal Society of Chemistry journal article supplement (doi:10.1039/b501399b), 2005-01-01
Supplement: b501399b.pdf [file b501399b.pdf]

**Isolation and characterization of the first circular single-stranded polymetallic lanthanide-containing helicate.**

---

Jean-Michel Senegas, Sylvain Koeller, Gérald Bernardinelli and Claude Piguet \*

**Supporting Information**

(15 pages)

## Experimental Section

**Solvents and Starting Materials.** Chemicals were purchased from Fluka AG and Aldrich, and used without further purification unless otherwise stated. The triflate salt  $\text{Eu}(\text{CF}_3\text{SO}_3)_3 \cdot 5\text{H}_2\text{O}$  was prepared from the corresponding oxides (Rhodia, 99.99 %) and dried according to a published procedure.<sup>1</sup> The Ln content of solid salts was determined by complexometric titrations with Titriplex III (Merck) in the presence of urotropine and xylene orange.<sup>2</sup> Thionyl chloride was distilled from elemental sulfur, acetonitrile, dichloromethane, *N,N*-dimethylformamide and triethylamine were distilled from  $\text{CaH}_2$ . Silicagel (Fluka, 0.040-0.063 mm) was used for preparative column chromatography. 6-Diethylcarbamoyl-pyridine-2-carboxylic acid (**2**) was prepared according to a literature procedure.<sup>3</sup>

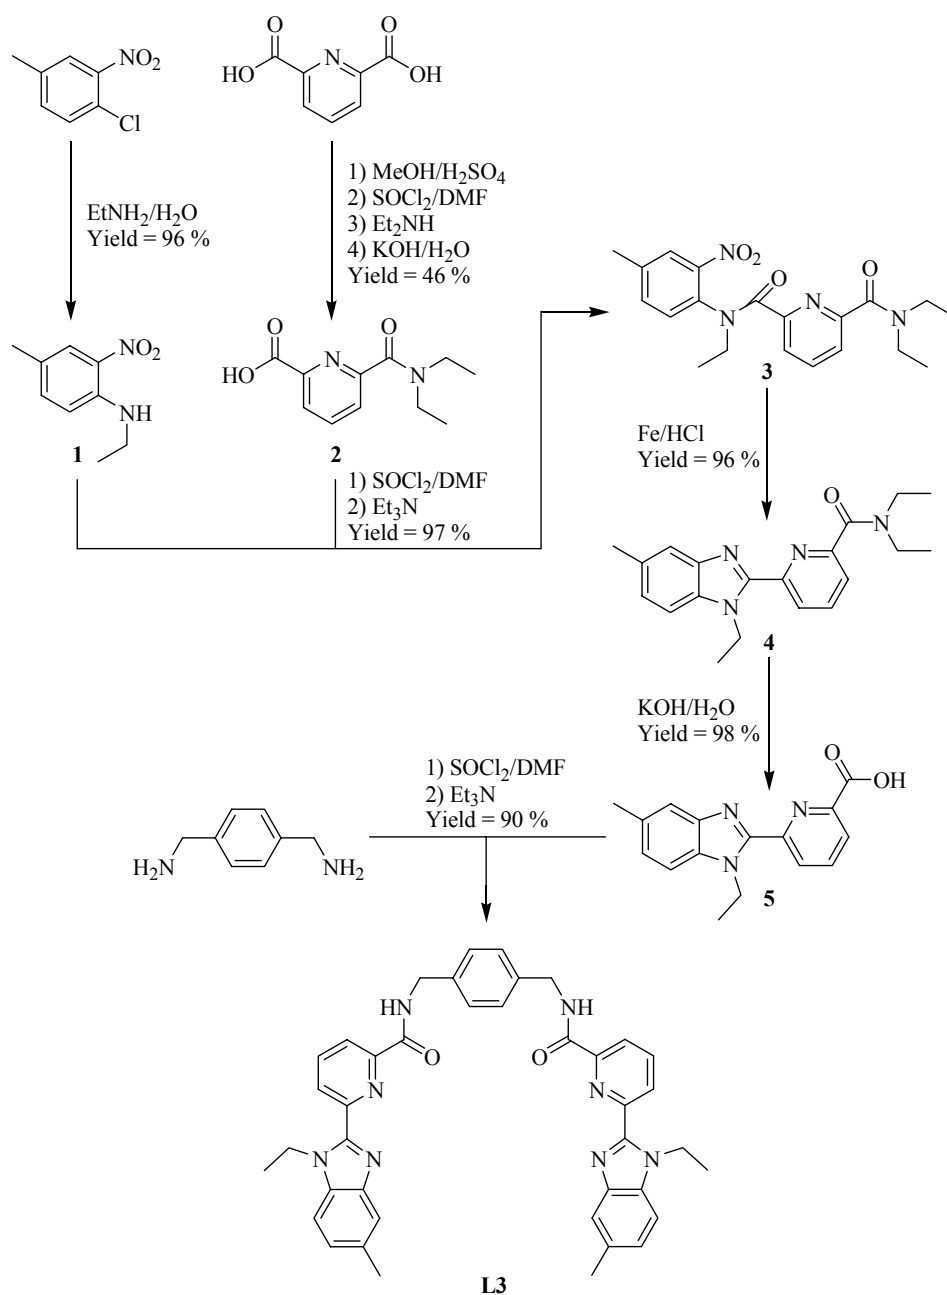

**Scheme S1** Synthesis of ligand **L3**.

**Preparation of ethyl-(4-methyl-2-nitro-phenyl)-amine (1).** A mixture of 4-chloro-3-nitrotoluene (17.2 g, 100 mmol) and ethylamine (100 mL, 70 % in water) was heated at 100 °C for 24 h in an autoclave and evaporated to dryness. The resulting red oil was dissolved in CH<sub>2</sub>Cl<sub>2</sub>/aqueous half-saturated NH<sub>4</sub>Cl (200 mL/200 mL), the organic layer was separated and the aqueous layer was extracted with CH<sub>2</sub>Cl<sub>2</sub> (3 × 30 mL). The combined organic phases were washed with deionized water (50 mL), dried over MgSO<sub>4</sub>, filtered and evaporated to dryness to afford ethyl-(4-methyl-2-nitro-phenyl)-amine **1** as an orange solid (17.30 g, 96 mmol, 96 %) which was pure enough to be used without further purification. <sup>1</sup>H NMR (CDCl<sub>3</sub>): 1.36 (t, <sup>3</sup>J = 7.2 Hz, 3H), 2.26 (s, 3H), 3.33 (dq, <sup>3</sup>J = 7.2 Hz and <sup>3</sup>J = 5.0 Hz, 2H), 6.77 (d, <sup>3</sup>J = 8.7 Hz, 1H), 7.27 (dd, <sup>3</sup>J = 8.7 Hz and <sup>4</sup>J = 2.2 Hz, 1H), 7.87 (b, 1H), 7.97 (d, <sup>3</sup>J = 2.2 Hz, 1H). <sup>13</sup>C NMR (CDCl<sub>3</sub>): 14.5, 20.0, 37.8, 113.8, 124.7, 126.1, 131.3, 137.9, 143.9.

**Preparation of pyridine-2,6-dicarboxylic acid 2-diethylamide 6-[ethyl-(4-methyl-2-nitro-phenyl)-amide] (3).** A mixture of 6-diethylcarbamoyl-pyridine-2-carboxylic acid (**2**, 8.89 g, 40 mmol), CH<sub>2</sub>Cl<sub>2</sub> (100 mL), thionyl chloride (30 mL, 400 mmol) and DMF (0.1 mL) was refluxed for 1.5 h under a nitrogen atmosphere and evaporated to dryness. The white residue was dried under vacuum for 30 min, dissolved in CH<sub>2</sub>Cl<sub>2</sub> (75 mL) and cooled at 0 °C. A mixture of *N*-ethyl-(4-methyl-2-nitrophenyl)amine (**1**, 6.31 g, 35 mmol), triethylamine (25 mL) and CH<sub>2</sub>Cl<sub>2</sub> (75 mL) was added dropwise over 10 min. The resulting solution was stirred for 10 min at 0 °C, refluxed for 2 h and evaporated to dryness. The brown residual oil was dissolved in CH<sub>2</sub>Cl<sub>2</sub>/aqueous half-saturated NH<sub>4</sub>Cl (200 mL/300 mL), the organic layer was separated and the aqueous layer was extracted with CH<sub>2</sub>Cl<sub>2</sub> (4 × 25 mL). The combined organic phases were washed with deionized water (50 mL), dried over MgSO<sub>4</sub>, filtered and evaporated to dryness. The resulting crude compound was purified by column chromatography (silicagel, CH<sub>2</sub>Cl<sub>2</sub>/MeOH 100/0→98/2) to afford pyridine-2,6-dicarboxylic acid 2-diethylamide 6-[ethyl-(4-methyl-2-nitro-phenyl)-amide] **3** as a brown solide (13.02 g, 33.9 mmol, 97 %). <sup>1</sup>H NMR (CDCl<sub>3</sub>): 0.88 (t, <sup>3</sup>J = 7.2 Hz, 3H), 1.18 (t, <sup>3</sup>J = 7.2 Hz, 3H), 1.21 (t, <sup>3</sup>J = 7.2 Hz, 3H), 2.33 (s, 3H), 2.97 (h, <sup>3</sup>J = 7.2 Hz, 1H), 3.11 (h, <sup>3</sup>J = 7.2 Hz, 1H), 3.30 (h, <sup>3</sup>J

= 7.2 Hz, 1H), 3.54 (m, 2H), 4.29 (h,  $^3J = 7.2$  Hz, 1H), 7.00 (d,  $^3J = 8.0$  Hz, 1H), 7.22 (m, 1H), 7.31 (dd,  $^3J = 7.5$  Hz and  $^4J = 1.3$  Hz, 1H), 7.69 (d,  $^3J = 8.0$  Hz, 1H), 7.72 (s, 1H), 7.77 (dd,  $^3J = 7.5$  Hz and  $^4J = 1.3$  Hz, 1H).  $^{13}\text{C}$  NMR ( $\text{CDCl}_3$ ): 12.6, 12.9, 14.3, 21.1, 40.1, 42.9, 46.1, 123.7, 124.7, 126.0, 130.1, 131.9, 134.5, 137.9, 139.4, 146.1, 151.7, 153.2, 166.7, 167.5.

**Preparation of 6-(1-ethyl-5-methyl-1H-benzoimidazol-2-yl)-pyridine-2-carboxylic acid diethylamide (4).** A mixture of pyridine-2,6-dicarboxylic acid 2-diethylamide 6-[ethyl-(4-methyl-2-nitro-phenyl)-amide] (**3**, 5.77 g, 15.0 mmol), ethanol (540 mL), water (150 mL), powdered iron (6.70 g, 120 mmol) and concentrated hydrochloric acid (37 %, 18 mL, 216 mmol) was refluxed for 18 h under nitrogen atmosphere, filtered and concentrated under vacuum. The residual aqueous layer was poured into a mixture of  $\text{CH}_2\text{Cl}_2$  (200 mL), water (370 mL) and  $\text{Na}_2\text{H}_2\text{EDTA} \cdot 2 \text{H}_2\text{O}$  (81 g, 217 mmol). The pH was adjusted to 7 with a 25 % aqueous ammonia solution, 30 % hydrogen peroxide solution (4.5 mL, 44.1 mmol) was slowly added and the mixture was stirred for 15 min. The pH was adjusted to 8.5 with a 25 % aqueous ammonia solution, the aqueous layer was extracted with  $\text{CH}_2\text{Cl}_2$  ( $3 \times 50$  mL), and the combined organic layers were washed with deionized water until neutral, dried over  $\text{MgSO}_4$ , filtered and evaporated to dryness. The resulting crude compound was purified by column chromatography (silicagel,  $\text{CH}_2\text{Cl}_2/\text{MeOH}$  98/2) to afford 6-(1-ethyl-5-methyl-1H-benzoimidazol-2-yl)-pyridine-2-carboxylic acid diethylamide **4** as a pale yellow solid (4.84 g, 14.4 mmol, 96 %).  $^1\text{H}$  NMR ( $\text{CDCl}_3$ ): 1.06 (t,  $^3J = 7.1$  Hz, 3H), 1.28 (t,  $^3J = 7.1$  Hz, 3H), 1.45 (t,  $^3J = 7.1$  Hz, 3H), 2.50 (s, 3H), 3.35 (q,  $^3J = 7.1$  Hz, 2H), 3.61 (q,  $^3J = 7.1$  Hz, 2H), 4.74 (q,  $^3J = 7.1$  Hz, 2H), 7.16 (d,  $^3J = 8.3$  Hz, 1H), 7.33 (d,  $^3J = 8.3$  Hz, 1H), 7.53 (d,  $^3J = 7.7$  Hz, 1H), 7.61 (s, 1H), 7.92 (t,  $^3J = 7.9$  Hz, 1H), 8.38 (d,  $^3J = 7.7$  Hz, 1H).  $^{13}\text{C}$  NMR ( $\text{CDCl}_3$ ): 12.9, 14.3, 15.4, 21.6, 39.5, 40.5, 42.8, 109.7, 119.9, 122.4, 124.9, 125.1, 132.4, 134.4, 137.9, 143.1, 149.2, 149.5, 154.5, 168.5. IR ( $\text{cm}^{-1}$ ): 1628, 1585, 1565. Mp = 129-131 °C.

**Preparation of 6-(1-ethyl-5-methyl-1H-benzoimidazol-2-yl)-pyridine-2-carboxylic acid (5).** A mixture of 6-(1-ethyl-5-methyl-1H-benzoimidazol-2-yl)-pyridine-2-carboxylic acid diethylamide (**4**, 3.36 g, 10.0 mmol), KOH (22.40 g, 400 mmol), EtOH (180 mL) and water (20 mL) was refluxed

for 24 h and concentrated under vacuum. The residual aqueous phase was diluted with water (100 mL) and the pH was adjusted to 2 with a 37 % aqueous hydrochloric acid solution. The white precipitate was filtered off, washed with water, dried under vacuum (2.74 g, 9.7 mmol, 98 %). It was pure enough to be used without further purification.  $^1\text{H}$  NMR (DMSO): 1.44 (t,  $^3J = 7.0$  Hz, 3H), 2.46 (s, 3H), 4.89 (q,  $^3J = 7.0$  Hz, 2H), 7.26 (d,  $^3J = 8.4$  Hz, 1H), 7.58 (s, 1H), 7.67 (d,  $^3J = 8.4$  Hz, 1H), 8.19 (m, 1H), 8.22 (t,  $^3J = 7.7$  Hz, 1H), 8.53 (dd,  $^3J = 7.4$  Hz and  $^4J = 1.6$  Hz, 1H).  $^{13}\text{C}$  NMR (DMSO): 15.2, 21.1, 40.8, 111.0, 118.0, 125.4, 125.8, 127.2, 133.0, 133.5, 139.0, 139.7, 147.3, 148.0, 148.2, 165.8. IR ( $\text{cm}^{-1}$ ): 3410, 1702, 1585, 1572. Mp = 243 °C.

**Typical procedure for the synthesis of the ligands. Preparation of *N,N'*-di-([6-(1-ethyl-5-methyl-1H-benzoimidazol-2-yl)-pyridin-2-yl]-oxomethyl)-4,4'-methylenedianiline (L5).** A mixture of 6-(1-ethyl-5-methyl-1H-benzoimidazol-2-yl)-pyridine-2-carboxylic acid (**5**, 422 mg, 1.5 mmol),  $\text{CH}_2\text{Cl}_2$  (30 mL), thionyl chloride (1.1 mL, 15.2 mmol) and DMF (0.01 mL) was refluxed for 1.5 h under a nitrogen atmosphere and evaporated to dryness. The white residue was dried under vacuum for 30 min, dissolved in  $\text{CH}_2\text{Cl}_2$  (30 mL) and cooled at 0 °C. A mixture of 4,4'-méthylènedianiline (100 mg, 0.5 mmol), triethylamine (0.25 mL) and  $\text{CH}_2\text{Cl}_2$  (30 mL) was added dropwise over 20 min. The resulting solution was stirred for 3 h at 25 °C, washed with  $2 \times 20$  mL of aqueous half-saturated  $\text{NaHCO}_3$ , deionized water until neutral, dried over  $\text{MgSO}_4$ , filtered and evaporated to dryness. The resulting crude compound was triturated in 30 mL of acetonitrile, filtered, rinsed with light petroleum ether and dried under vacuum. Recrystallisation from hot DMF afford *N,N'*-di-([6-(1-ethyl-5-methyl-1H-benzoimidazol-2-yl)-pyridin-2-yl]-oxomethyl)-4,4'-methylenedianiline **L5** as a white solid (350 mg, 0.48 mmol, 97 %).  $^1\text{H}$  NMR ( $\text{CDCl}_3$ ): 1.71 (t,  $^3J = 7.2$  Hz, 6H), 2.52 (s, 6H), 4.00 (s, 2H), 4.77 (q,  $^3J = 7.2$  Hz, 4H), 7.22 (dd,  $^3J = 8.4$  and  $^4J = 1.4$  Hz, 2H), 7.25 (d,  $^3J = 8.5$  Hz, 4H), 7.38 (d,  $^3J = 8.3$  Hz, 2H), 7.65 (s, 2H), 7.69 (d,  $^3J = 8.5$  Hz, 4H), 8.08 (t,  $^3J = 7.8$  Hz, 2H), 8.37 (dd,  $^3J = 7.7$  Hz and  $^4J = 1.0$  Hz, 2H), 8.56 (dd,  $^3J = 7.7$  Hz and  $^4J = 1.0$  Hz, 2H), 9.72 (s, 2H). ESI-MS ( $m/z$  (%)): 236.1 (70), 363.9 (85)  $[\text{L}+2\text{H}]^{2+}$ , 727.3 (90)  $[\text{L}+\text{H}]^+$ . Mp = 310 °C (dec).

**Preparation of *N,N'*-di-([6-(1-ethyl-5-methyl-1H-benzoimidazol-2-yl)-pyridin-2-yl]-oxomethyl)-1,4-di(aminomethyl)-benzene (L3).** The ligand was prepared using the typical procedure described for **L5** starting from  $\alpha,\alpha'$ -amino-*p*-xylene (68 mg, 0.5 mmol) and 6-(1-ethyl-5-methyl-1H-benzoimidazol-2-yl)-pyridine-2-carboxylic acid (**5**, 422 mg, 1.5 mmol), it was purified

by column chromatography (silicagel, CH<sub>2</sub>Cl<sub>2</sub>/MeOH 97/3) to afford *N,N'*-di-([6-(1-ethyl-5-methyl-1H-benzoimidazol-2-yl)-pyridin-2-yl]-oxomethyl)-1,4-di(aminomethyl)-benzene **L3** as a white solid (300 mg, 0.45 mmol, 90 %). <sup>1</sup>H NMR (CDCl<sub>3</sub>): 1.37 (t, <sup>3</sup>*J* = 7.3 Hz, 6H), 2.52 (s, 6H), 4.61 (q, <sup>3</sup>*J* = 7.1 Hz, 4H), 4.73 (d, <sup>3</sup>*J* = 6.8 Hz, 4H), 7.18 (dd, <sup>3</sup>*J* = 8.3 Hz and <sup>4</sup>*J* = 1.0 Hz, 2H), 7.28 (d, <sup>3</sup>*J* = 8.3 Hz, 2H), 7.41 (s, 4H), 7.63 (s, 2H), 8.06 (t, <sup>3</sup>*J* = 7.8 Hz, 2H), 8.09 (bs, 2H), 8.33 (dd, <sup>3</sup>*J* = 7.5 Hz and <sup>4</sup>*J* = 1.0 Hz, 2H), 8.55 (dd, <sup>3</sup>*J* = 7.8 Hz and <sup>4</sup>*J* = 1.0 Hz, 2H). ESI-MS (CH<sub>2</sub>Cl<sub>2</sub> + 0.01 % TFA): 236.1 (85), 281.1 (55), 333.0 (100) [L+2H]<sup>2+</sup>, 383.3 (75), 664.8 (95) [L+H]<sup>+</sup>. Mp = 262 °C.

**Preparation of *N,N'*-di-([6-(1-ethyl-5-methyl-1H-benzoimidazol-2-yl)-pyridin-2-yl]-oxomethyl)-1,3-di(aminomethyl)-benzene (L4).** The ligand was prepared using the typical procedure described for **L5** starting from α,α'-amino-*m*-xylene (68 mg, 0.5 mmol) and 6-(1-ethyl-5-methyl-1H-benzoimidazol-2-yl)-pyridine-2-carboxylic acid (**5**, 422 mg, 1.5 mmol) to afford *N,N'*-di-([6-(1-ethyl-5-methyl-1H-benzoimidazol-2-yl)-pyridin-2-yl]-oxomethyl)-1,3-di(aminomethyl)-benzene **L4** as a white solid (300 mg, 0.45 mmol, 91 %). <sup>1</sup>H NMR (CDCl<sub>3</sub>): 1.30 (t, <sup>3</sup>*J* = 7.2 Hz, 6H), 2.50 (s, 6H), 4.00 (s, 2H), 4.51 (q, <sup>3</sup>*J* = 7.2 Hz, 4H), 4.73 (d, <sup>3</sup>*J* = 5.9 Hz, 4H), 7.15 (dd, <sup>3</sup>*J* = 8.4 Hz and <sup>4</sup>*J* = 1.4 Hz, 2H), 7.22 (d, <sup>3</sup>*J* = 8.5 Hz, 4H), 7.37 (m, 4H), 7.59 (s, 2H), 7.95 (t, <sup>3</sup>*J* = 7.8 Hz, 2H), 8.14 (t, <sup>3</sup>*J* = 5.9 Hz, 2H), 8.23 (dd, <sup>3</sup>*J* = 7.7 Hz and <sup>4</sup>*J* = 1.0 Hz, 2H), 8.46 (dd, <sup>3</sup>*J* = 7.7 Hz and <sup>4</sup>*J* = 1.0 Hz, 2H). <sup>13</sup>C NMR (CDCl<sub>3</sub>): 15.3, 21.6, 40.3, 43.6, 109.4, 120.0, 122.4, 125.4, 127.2, 127.4, 129.4, 132.6, 134.2, 138.4, 138.8, 142.9, 148.4, 148.9, 149.2, 164.0. ESI-MS (*m/z* (%)): 236.1 (52), 281.1 (38), 333.1 (100) [L+2H]<sup>2+</sup>, 383.3 (95), 665.0 (97) [L+H]<sup>+</sup>. Mp = 184 °C.

**Preparation of *N,N'*-di-([6-(1-ethyl-5-methyl-1H-benzoimidazol-2-yl)-pyridin-2-yl]-oxomethyl)-1,6-diamino-hexane (L6).** The ligand was prepared using the typical procedure described for **L5** starting from 1,6-diaminohexane (58 mg, 0.5 mmol) and 6-(1-ethyl-5-methyl-1H-benzoimidazol-2-yl)-pyridine-2-carboxylic acid (**5**, 422 mg, 1.5 mmol), it was purified by column chromatography (silicagel, CH<sub>2</sub>Cl<sub>2</sub>/MeOH 97/3) to afford *N,N'*-di-([6-(1-ethyl-5-methyl-1H-benzoimidazol-2-yl)-pyridin-2-yl]-oxomethyl)-1,6-diamino-hexane **L6** as a white solid (300 mg, 0.47 mmol, 93 %). <sup>1</sup>H NMR (CDCl<sub>3</sub>): 1.52 (b, 4H), 1.61 (t, <sup>3</sup>*J* = 7.1 Hz, 6H), 2.54 (s, 6H), 1.71 (b, 4H), 3.55 (q, <sup>3</sup>*J* = 7.1 Hz, 4H), 4.73 (q, <sup>3</sup>*J* = 7.1 Hz, 4H), 7.22 (dd, <sup>3</sup>*J* = 8.3 Hz and <sup>4</sup>*J* = 1.0 Hz, 2H), 7.37 (d, <sup>3</sup>*J* = 8.3 Hz, 2H), 7.67 (s, 2H), 7.85 (b, 2H), 8.04 (t, <sup>3</sup>*J* = 7.8 Hz, 2H), 8.28 (dd, <sup>3</sup>*J* = 7.8 Hz

and  $^4J = 1.0$  Hz, 2H), 8.51 (dd,  $^3J = 7.8$  Hz and  $^4J = 1.0$  Hz, 2H). ESI-MS ( $m/z$  (%)): 643.7 (39)  $[L+H]^+$ , 665.7 (100)  $[L+Na]^+$ .  $MP = 200$  °C.

**Synthesis of the complex  $[Eu_3(L3)_3(CF_3SO_3)_9](H_2O)_4$ .** L3 (20 mg, 0.029 mmol) dissolved in dichloromethane (2 mL) was added to  $Eu(CF_3SO_3)_3 \cdot 5H_2O$  (20 mg, 0.029 mmol) in acetonitrile (2 mL). After stirring at RT for 1 h, diethylether was slowly diffused for 24 h. Filtration of the resulting mixture gave  $[Eu_3(L3)_3(CF_3SO_3)_9](H_2O)_4$  as white microcrystals (31.5 mg, 0.024 mmol, 84 %). Anal Calcd for  $Eu_3C_{129}H_{122}N_{24}O_{37}S_9F_{27}$ : C, 39.89; H, 3.17; N, 8.63. Found: C, 39.80; H, 3.25; N, 8.52. Very fragile X-ray quality prisms of  $[Eu_3(L3)_3(CF_3SO_3)_4(CH_3CN)_2(H_2O)_3](CF_3SO_3)_5(CH_3CN)_9(H_2O)_2$  (**1**) could be obtained by slow diffusion of diisopropylether into a concentrated acetonitrile solution of  $[Eu_3(L3)_3(CF_3SO_3)_9](H_2O)_4$ .

**Single Crystal Structure Determinations.** Summary of crystal data, intensity measurements and structure refinements for  $[Eu_3(L3)_3(CF_3SO_3)_4(CH_3CN)_2(H_2O)_3](CF_3SO_3)_5(CH_3CN)_9(H_2O)_2$  (**1**) are collected in Table S1. The crystal was mounted on quartz fibers with protection oil. Cell dimensions and intensities were measured at 200 K on a Stoe IPDS diffractometer with graphite-monochromated  $Mo[K\alpha]$  radiation ( $\lambda = 0.71073$  Å). Data were corrected for Lorentz and polarization effects and for absorption. The structure were solved by direct methods (SIR97),<sup>4</sup> all other calculation were performed with XTAL<sup>5</sup> system and ORTEP<sup>6</sup> programs. The atomic positions of the hydrogen atoms were calculated except for those of the solvent molecules, which were refined with restraints on bond lengths and bond angles, and blocked during the last cycle of the refinement process. The water molecules O5w and O6w (without hydrogen atoms) were refined with population parameters  $PP = 0.5$ . The disordered triflates g and k were each refined on two different sites with population parameters of 0.25/0.75 and 0.3/0.7 respectively. All non-hydrogen atoms were refined with anisotropic displacement parameters. CCDC 261626 contains the supplementary crystallographic data. These data can be obtained free of charge via

www.ccdc.cam.ac.uk/conts/retrieving.html (or from the Cambridge Crystallographic Data Centre, 12, Union Road, Cambridge CB2 1EZ, UK; fax: (+44) 1223-336-033; or [deposit@ccdc.cam.ac.uk](mailto:deposit@ccdc.cam.ac.uk)).

## References

- 1 J. F. Desreux in *Lanthanide Probes in Life, Chemical and Earth Sciences* (Eds.: J.-C. G. Bünzli, G. R. Choppin), Elsevier, Amsterdam, 1989, Chap. 2, p. 43.
- 2 G. Schwarzenbach, *Complexometric Titrations*; Chapman & Hall: London, 1957 p. 8.
- 3 M. Elhabiri, R. Scopelliti, J.-C. G. Bünzli and C. Piguet, *J. Am. Chem. Soc.*, 1999, **121**, 10747.
- 4 A. Altomare, M.C. Burla, M. Camalli, G. Cascarano, C. Giacovazzo, A. Guagliardi, A.G.G. Moliterni, G. Polidori and R. Spagna, *J. Appl. Cryst.*, 1999, **32**, 115.
- 5 *XTAL 3.2 User's Manual*, S. R. Hall, H. D. Flack and J. M. Stewart, Eds. Universities of Western Australia and Maryland, 1989.
- 6 C. K. Johnson, *ORTEP II; Report ORNL-5138*, Oak Ridge National Laboratory: Oak Ridge, Tennessee, 1976.

**Table S1** Summary of crystal data, intensity measurement and structure refinement for  $[\text{Eu}_3(\text{L3})_3(\text{CF}_3\text{SO}_3)_4(\text{CH}_3\text{CN})_2(\text{H}_2\text{O})_3](\text{CF}_3\text{SO}_3)_5(\text{CH}_3\text{CN})_9(\text{H}_2\text{O})_2$  (**1**).

|                                                      |                                                                                            |
|------------------------------------------------------|--------------------------------------------------------------------------------------------|
| Formula                                              | $\text{Eu}_3\text{C}_{151}\text{H}_{157}\text{N}_{35}\text{O}_{38}\text{S}_9\text{F}_{27}$ |
| $fw$                                                 | 4327.0                                                                                     |
| Color                                                | colorless                                                                                  |
| Crystal system                                       | triclinique                                                                                |
| Space group                                          | $P\bar{1}$                                                                                 |
| $a$ , Å                                              | 14.7345(11)                                                                                |
| $b$ , Å                                              | 21.8136(12)                                                                                |
| $c$ , Å                                              | 31.790(2)                                                                                  |
| $\alpha$ , deg.                                      | 100.262(7)                                                                                 |
| $\beta$ , deg.                                       | 100.850(8)                                                                                 |
| $\gamma$ , deg.                                      | 103.813(8)                                                                                 |
| $V$ , Å <sup>3</sup>                                 | 9475(1)                                                                                    |
| $Z$                                                  | 2                                                                                          |
| $d_{\text{calc}}$ , g·cm <sup>-3</sup>               | 1.517                                                                                      |
| $\mu_{\text{Mo-K}\alpha}$ , mm <sup>-1</sup>         | 1.185                                                                                      |
| $T_{\text{min}}/T_{\text{max}}$                      | 0.7125 / 0.7985                                                                            |
| Crystal size, mm                                     | 0.25 x 0.30 x 0.32                                                                         |
| $2\theta$ max (deg)                                  | $4.1^\circ < 2\theta < 51.9^\circ$                                                         |
| No. of reflns collected                              | 100'621                                                                                    |
| No. of independent reflns                            | 34'501                                                                                     |
| $R_{\text{int}}$                                     | 0.060                                                                                      |
| No. of obsd <sup>a</sup> (used <sup>b</sup> ) reflns | 18'853 (19896)                                                                             |
| No. of variables                                     | 2228                                                                                       |
| Weighting scheme, $\omega$                           | $1/(\sigma^2(F_o) + 0.00015(F_o)^2)$                                                       |
| Max. et Min. $\Delta\rho$ , eÅ <sup>-3</sup>         | 3.91 / -2.39                                                                               |
| GOF ( $F$ ) <sup>c</sup> (all data)                  | 1.93(1)                                                                                    |
| $R^d$ , $\omega R^e$                                 | 0.063 / 0.065                                                                              |

<sup>a</sup>  $|F_o| > 4\sigma(F_o)$ . <sup>b</sup> Used in the refinements (including reflns with  $|F_o| \leq 4\sigma(F_o)$  if  $|F_c| > |F_o|$ ). <sup>c</sup>  $S = [\sum \{((F_o - F_c) / \sigma(F_o))^2\} / (N_{\text{ref}} - N_{\text{var}})]^{1/2}$ . <sup>d</sup>  $R = \sum ||F_o| - |F_c|| / \sum |F_o|$ . <sup>e</sup>  $\omega R = [\sum (\omega|F_o| - |F_c|)^2 / \sum \omega|F_o|^2]^{1/2}$

**Table S2** Selected bond distances (Å) in  $[\text{Eu}_3(\text{L3})_3(\text{CF}_3\text{SO}_3)_4(\text{CH}_3\text{CN})_2(\text{H}_2\text{O})_3](\text{CF}_3\text{SO}_3)_5(\text{CH}_3\text{CN})_9(\text{H}_2\text{O})_2$  (**1**).

|           |            |         |          |         |          |
|-----------|------------|---------|----------|---------|----------|
| Eu1...Eu2 | 11.9977(7) |         |          |         |          |
| Eu1...Eu3 | 12.3217(8) |         |          |         |          |
| Eu2...Eu3 | 11.7933(8) |         |          |         |          |
| Eu1-O1a   | 2.384(6)   | Eu2-O2a | 2.392(5) | Eu3-O2b | 2.385(7) |
| Eu1-N2a   | 2.601(9)   | Eu2-N6a | 2.577(7) | Eu3-N6b | 2.595(8) |
| Eu1-N3a   | 2.553(7)   | Eu2-N7a | 2.586(7) | Eu3-N7b | 2.556(6) |
| Eu1-O2c   | 2.411(7)   | Eu2-O1b | 2.422(7) | Eu3-O1c | 2.383(7) |
| Eu1-N6c   | 2.621(8)   | Eu2-N2b | 2.594(7) | Eu3-N2c | 2.595(7) |
| Eu1-N7c   | 2.577(8)   | Eu2-N3b | 2.564(9) | Eu3-N3c | 2.532(7) |
| Eu1-O1d   | 2.461(9)   | Eu2-O1e | 2.416(8) | Eu3-O1f | 2.401(8) |
| Eu1-O1w   | 2.405(8)   | Eu2-N1m | 2.537(8) | Eu3-O1g | 2.46(1)  |
| Eu1-O2w   | 2.415(6)   | Eu2-O3w | 2.409(6) | Eu3-N1n | 2.60(1)  |

**Table S3** Selected least-squares plane data for  $[\text{Eu}_3(\mathbf{L3})_3(\text{CF}_3\text{SO}_3)_4(\text{CH}_3\text{CN})_2(\text{H}_2\text{O})_3](\text{CF}_3\text{SO}_3)_5(\text{CH}_3\text{CN})_9(\text{H}_2\text{O})_2$  (**1**).

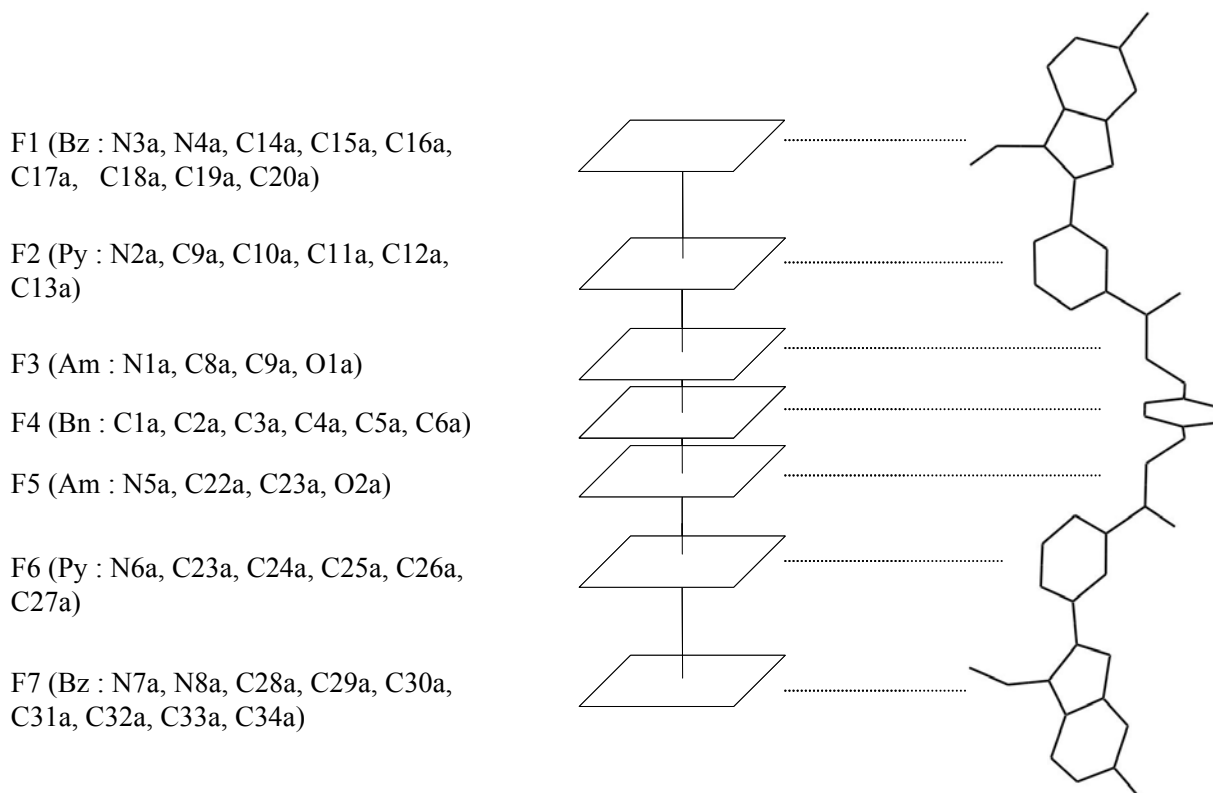

Abbreviation: Py: pyridine; Bz: benzimidazole; Bn: benzene; Am: amide

| Least-squares planes description, strand a                  | Deviations, Å |      |
|-------------------------------------------------------------|---------------|------|
|                                                             | max           | atom |
| F1 (Bz: N3a, N4a, C14a, C15a, C16a, C17a, C18a, C19a, C20a) | 0.017         | C19a |
| F2 (Py: N2a, C9a, C10a, C11a, C12a, C13a)                   | 0.014         | C11a |
| F3 (Am: N1a, C8a, C9a, O1a)                                 | 0.014         | C9a  |
| F4 (Bn: C1a, C2a, C3a, C4a, C5a, C6a)                       | 0.016         | C3a  |
| F5 (Am: N5a, C22a, C23a, O2a)                               | 0.013         | C23a |
| F6 (Py: N6a, C23a, C24a, C25a, C26a, C27a)                  | 0.013         | C26a |
| F7 (Bz: N7a, N8a, C28a, C29a, C30a, C31a, C32a, C33a, C34a) | 0.016         | C32a |

| Least-squares planes description, strand b                   | Deviations, Å |      |
|--------------------------------------------------------------|---------------|------|
|                                                              | max           | atom |
| F1 (Bz : N3b, N4b, C14b, C15b, C16b, C17b, C18b, C19b, C20b) | 0.018         | C18b |
| F2 (Py : N2b, C9b, C10b, C11b, C12b, C13b)                   | 0.017         | C11b |
| F3 (Am : N1b, C8b, C9b, O1b)                                 | 0.016         | C9b  |
| F4 (Bn : C1b, C2b, C3b, C4b, C5b, C6b)                       | 0.015         | C2b  |
| F5 (Am : N5b, C22b, C23b, O2b)                               | 0.015         | C23b |
| F6 (Py : N6b, C23b, C24b, C25b, C26b, C27b)                  | 0.015         | C25b |
| F7 (Bz : N7b, N8b, C28b, C29b, C30b, C31b, C32b, C33b, C34b) | 0.019         | C32b |

| Least-squares planes description, strand c                   | Deviations, Å |      |
|--------------------------------------------------------------|---------------|------|
|                                                              | max           | atom |
| F1 (Bz : N3c, N4c, C14c, C15c, C16c, C17c, C18c, C19c, C20c) | 0.018         | C19c |
| F2 (Py : N2c, C9c, C10c, C11c, C12c, C13c)                   | 0.016         | C11c |
| F3 (Am : N1c, C8c, C9c, O1c)                                 | 0.014         | C9c  |
| F4 (Bn : C1c, C2c, C3c, C4c, C5c, C6c)                       | 0.016         | C3c  |
| F5 (Am : N5c, C22c, C23c, O2c)                               | 0.015         | C23c |
| F6 (Py : N6c, C23c, C24c, C25c, C26c, C27c)                  | 0.016         | C24c |
| F7 (Bz : N7c, N8c, C28c, C29c, C30c, C31c, C32c, C33c, C34c) | 0.015         | C32c |

Interplanar angles, strand a

|    | F2 | F3 | F4 | F5 | F6 | F7 |
|----|----|----|----|----|----|----|
| F1 | 1  | 2  | 90 | 57 | 61 | 38 |
| F2 |    | 2  | 90 | 59 | 62 | 39 |
| F3 |    |    | 89 | 59 | 62 | 39 |
| F4 |    |    |    | 86 | 88 | 83 |
| F5 |    |    |    |    | 7  | 23 |
| F6 |    |    |    |    |    | 24 |

Interplanar angles, strand b

|    | F2 | F3 | F4 | F5 | F6 | F7 |
|----|----|----|----|----|----|----|
| F1 | 10 | 18 | 87 | 68 | 71 | 59 |
| F2 |    | 9  | 90 | 59 | 61 | 49 |
| F3 |    |    | 83 | 52 | 56 | 45 |
| F4 |    |    |    | 87 | 87 | 84 |
| F5 |    |    |    |    | 6  | 13 |
| F6 |    |    |    |    |    | 13 |

Interplanar angles, strand c

|    | F2 | F3 | F4 | F5 | F6 | F7 |
|----|----|----|----|----|----|----|
| F1 | 2  | 11 | 89 | 54 | 55 | 51 |
| F2 |    | 11 | 90 | 55 | 57 | 52 |
| F3 |    |    | 81 | 48 | 52 | 47 |
| F4 |    |    |    | 76 | 88 | 90 |
| F5 |    |    |    |    | 16 | 14 |
| F6 |    |    |    |    |    | 5  |

a)

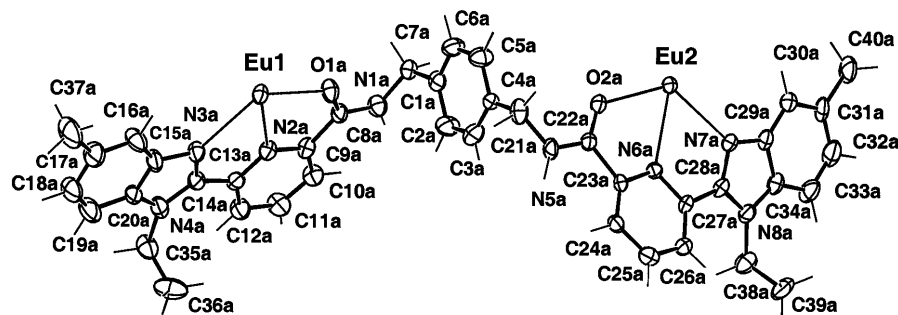

b)

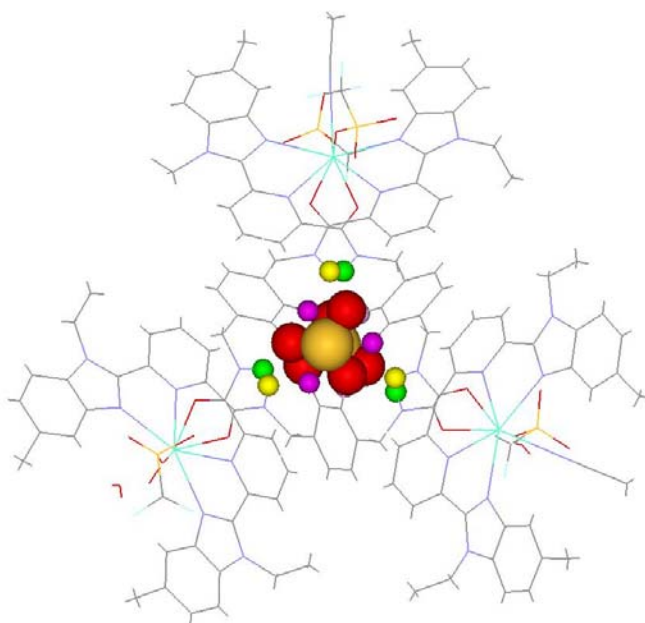

c)

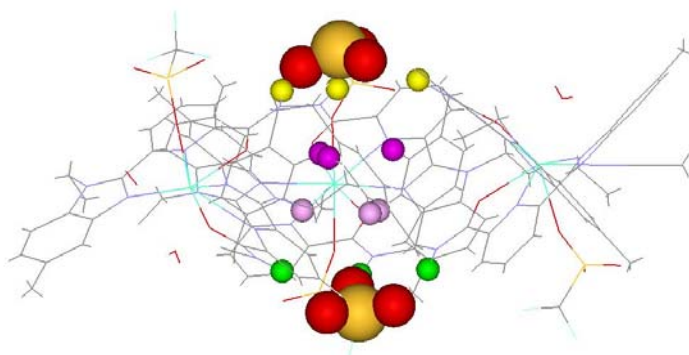

**Fig S1** a) Complete numbering scheme used for the ligand strand a in the crystal structure of **1** (atomic numbering for strands b and c follows the same scheme). Views of the  $\{[\text{Eu}_3(\text{L}3)_3(\text{CF}_3\text{SO}_3)_4(\text{CH}_3\text{CN})_2(\text{H}_2\text{O})_3](\text{CF}_3\text{SO}_3)_2\}^{3+}$  cationic aggregate respectively b) along and c) perpendicular to the pseudo-threefold axis highlighting the ionic triflates *j* and *l* capping the two half bowl-shaped cavities. The surface of the bottom cavity is defined by H3a,b,c (pale pink spheres) and H05a,b,c (green spheres). The surface of the top cavity is defined by H2a,b,c (dark pink spheres) and H05a,b,c (yellow spheres).

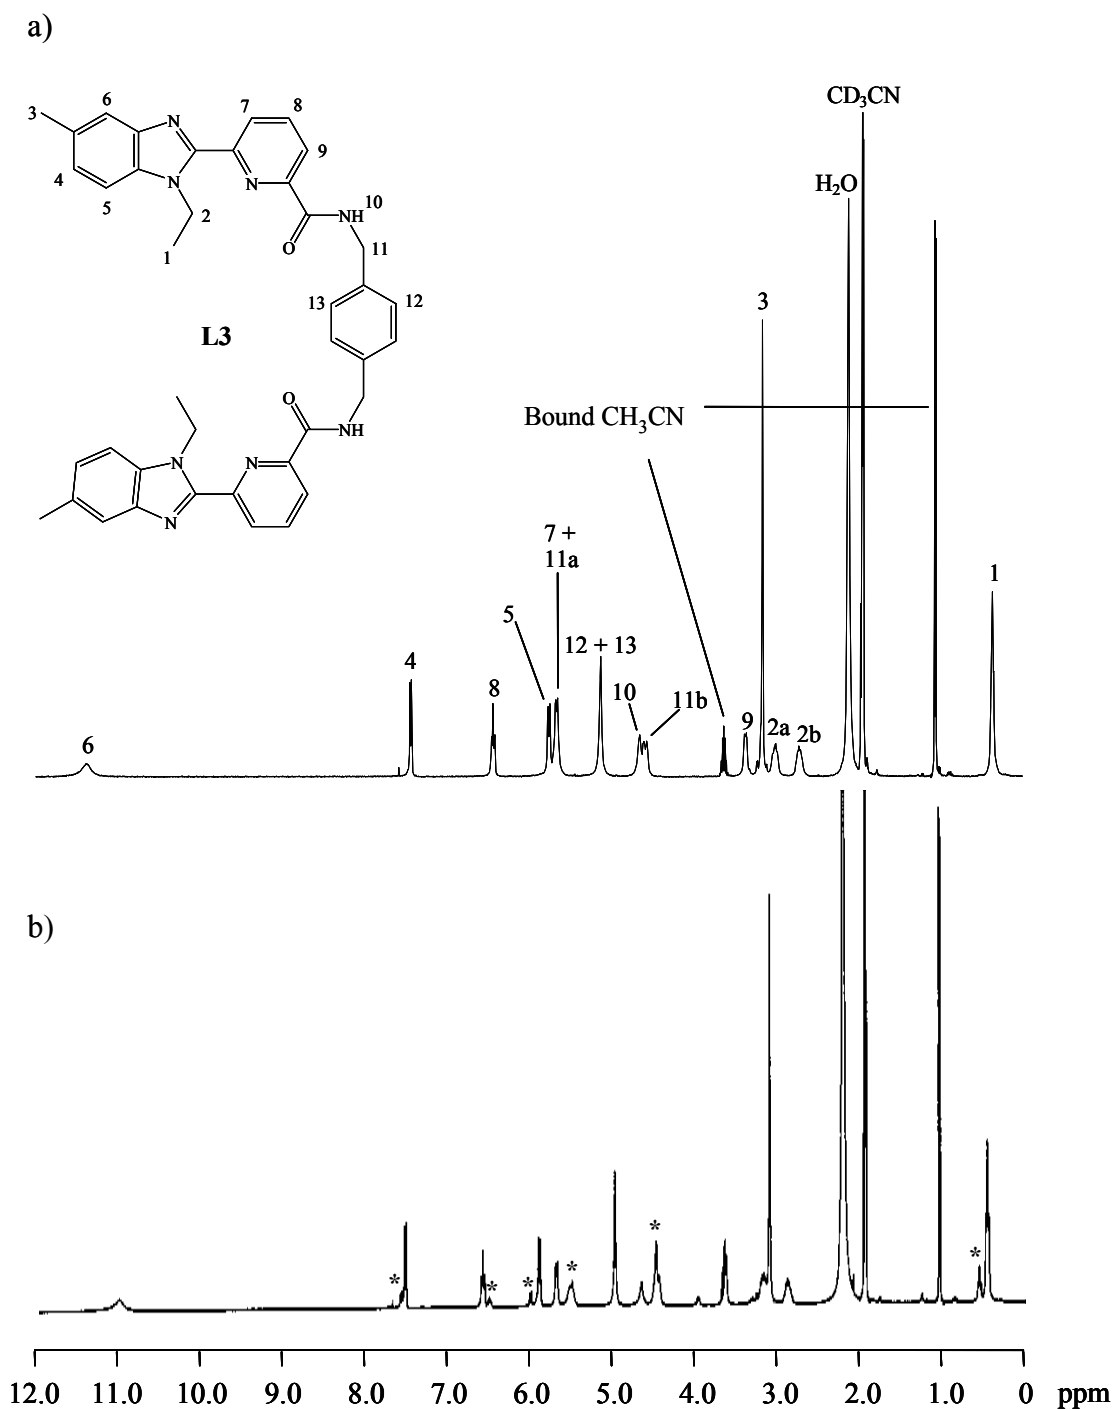

**Fig. S2** Numbering scheme for the protons of the ligand **L3** and  $^1\text{H}$  NMR spectra of  $[\text{Eu}_3(\text{L3})_3]^{9+}$  in  $\text{CD}_3\text{CN}$  (298 K), a) immediately after dissolution of crystals of **1**, and b) after one day. The \* highlight the new species which is slowly formed upon re-equilibration.
